# Supplementary material for: Supporting Indigenous adaptation in a changing climate
Source: Oxford University Press journal article supplement (doi:10.1525/elementa.2020.00164), 2021-01-01
Supplement: gaueretal_supplemental_file.docx [file gaueretal_supplemental_file.docx]

**Supplemental material**

Supporting Indigenous adaptation in a changing climate: insights from the Stó:lō Research and Resource Management Centre (British Columbia) and the Fort Apache Heritage Foundation (Arizona)

Viviane H. Gauer*,1, David M. Schaepe1,2, John R. Welch1

1 School of Resource and Environmental Management, Simon Fraser University, Burnaby, British Columbia, Canada

2 Stó:lō Research and Resource Management Centre, Stó:lō Nation, Chilliwack, British Columbia, Canada

* Corresponding author: Viviane H. Gauer ([vhippman@sfu.ca](mailto:vhippman@sfu.ca))

**List of Contents:**

**Text S1. Semi-structured Interview Guide.**

Text S1. Semi-structured Interview Guide.

1. *Introduction*

- Research project introduction
- Participant consent form
- Oral consent to record interview

1. *Climatic and environmental changes*

- Have you noticed change in weather or in the natural environment within your traditional territory/tribal reservation over time?
- Do you perceive these changes as being related to global climate change?
- Would you say that climate change is currently a topic within the community?
- What would you say are the most worrisome climate change effects to the community, if any?
- Would you say that culturally important activities are being harmed by these changes?

1. *Climate adaptation*

- Have you or people that you know been personally coping with any of these changes in any way?
- Do you know of any ongoing initiatives on adaptation to climate change within the community?
- What would you say are the main challenges for the community to adapt to climate change effects?
- In your opinion, what changes are necessary for the community to be prepared for future obstacles, such as harmful climate change effects?

1. *Organizational services*

- Would you say that the organization is well integrated into the community?
- How do you think the organization could best support the community in preparing for climate change effects?

1. *Organizational familiarization* *(Applicable to organizational board members and staff)*

- How would you describe this organization?
- How do you see the mission, vision, and values of the organization?
- Who does this organization serve?
- What is the organization currently involved with?
- Regarding the work that the organization is currently involved with, is there anything that is touching on climate change or that has a direct link with any climate change effects?
- What can you tell me about the organization’s network? What are its main project partners?
